# Supplementary material
Source: PubMed Central journal article supplement (PMC7574425)
Supplement: 12888_2020_2905_MOESM1_ESM.pdf [file 12888_2020_2905_MOESM1_ESM.pdf]

Do you experience more discomfort because of your obsessions and compulsions now after the outbreak of COVID-19?

Much less discomfort  
Less discomfort  
Unchanged  
More discomfort  
Much more discomfort

Are you trying to fight your obsessions and compulsions to a lesser degree after the outbreak of COVID-19?

No, fight much more  
No, fight more now  
Unchanged  
Yes, fight less  
Yes, fight much less

When your obsessions are active, has it become more difficult to withstand your rituals?

No, much easier  
No, easier  
Unchanged  
Yes, more difficult  
Yes, much more difficult

Do you avoid more situations now compared to the time without COVID-19? The question concerns situations or things apart from those recommended by the authorities

Yes                  No

If yes, please describe which situations or things

Have you experienced new OCD thoughts or rituals after the outbreak?

Yes                  No

If yes, please describe the new obsessions and compulsions

Have you experienced that COVID-19 has become part of your obsessions and compulsions?

Yes                  No

### **Questions about other symptoms**

Do you experience more anxiety or has your anxiety changed after the outbreak of COVID-19?

Much less anxiety  
Less anxiety  
Unchanged  
More anxiety  
Much more anxiety

Have you experienced new anxiety symptoms after the outbreak?

Yes                  No

If yes, please describe the new symptoms

Do you experience increased sadness after the outbreak of COVID-19?

No, much less  
No, less  
Unchanged  
Yes, more  
Yes, much more

Which factors have affected you in relation to the COVID-19 outbreak in Denmark? Check the box, if any.

I could become ill  
Others could become ill  
I could infect other  
How will it end  
When will it normalise  
Not going to school  
Not being with friends  
Not doing leisure activities  
Being together in the family

### **Questions about COVID-19**

How close have you been to the infection?

I have been ill with COVID19  
I have been in quarantine  
Family who were ill  
Family who were in quarantine  
Friends who were ill  
Friends who were in quarantine  
Heard about the infection

How often do you listen to news about COVID-19+

Less than once daily  
Once daily  
Several times daily

How often do you read about COVID-19?

Less than once daily  
Once daily  
Several times daily

How often do you talk about COVID-19 at home?

Rarely  
Daily  
Several times daily

How often do you talk about COVID-19 with friends?

Rarely  
Daily  
Several times daily

Do you think that your parents are worried?

No, not worried  
Yes, a little worried  
Yes, worried a lot

Do you think that your siblings are worried

No, not worried  
Yes, a little worried  
Yes, worried a lot

*Thank you very much for your help*
